# Supplementary material for: ICD-10 codes used to identify adverse drug events in administrative data: a systematic review
Source: PubMed Central journal article supplement — J Am Med Inform Assoc. 2013 Nov 12;21(3):547–57. doi: 10.1136/amiajnl-2013-002116 (PMC3994866; doi:10.1136/amiajnl-2013-002116), 2013-11-12
Supplement: amiajnl-2013-002116-s2.pdf [file amiajnl-2013-002116-s2.pdf]

## APPENDIX A. Medline Search Strategy.

Database: Ovid MEDLINE(R) 1948 to Present with Daily Update  
Search Strategy:

- 
- 1 "Identification of Adverse Drug Reactions Using the ICD-10 Australian Modification Clinical Coding Surveillance".ti. (0)
  - 2 "Identification of Adverse Drug Reactions Using the ICD-10".ti. (0)
  - 3 Identification of Adverse Drug Events.ti. (1)
  - 4 Prescribing errors in patients with documented drug allergies.ti. (1)
  - 5 Pediatric Adverse Drug Events in the Outpatient Setting.ti. (1)
  - 6 the frequency of adverse drug reaction related admissions.ti. (1)
  - 7 Adverse drug events in hospitals: a systematic review.ti. (1)
  - 8 adverse drug reactions in patients admitted to hospital.ti. (1)
  - 9 Adverse drug events caused by medication.ti. (2)
  - 10 (Diagnostic codes for sudden cardiac death and ventricular).ti. (1)
  - 11 evaluation of a computer based adverse drug event.ti. (1)
  - 12 A Steep Increase in Domestic Fatal Medication.ti. (1)
  - 13 (adverse drug events and medication errors in australia).ti. (1)
  - 14 Surveillance of methadone-related adverse drug events using.ti. (1)
  - 15 hospital admissions for drug induced disorders.ti. (1)
  - 16 or/1-15 (14) [titles identified on prior literature scan]
  - 17 (ICD-10 or ICD10).tw. (4312)
  - 18 Adverse Drug Reaction Reporting Systems/ (4520)
  - 19 exp Drug Toxicity/ (26554)
  - 20 exp Pharmaceutical Preparations/ (533767)
  - 21 ae.fs. (1166547)
  - 22 20 and 21 (66597)
  - 23 Medication Errors/ (8565)
  - 24 exp Drug Hypersensitivity/ (32542)
  - 25 adverse drug.tw. (8569)
  - 26 or/18-19,21-25 (1190346)
  - 27 17 and 26 (281)
  - 28 limit 27 to English language (216)
  - 29 28 not 16 (211)

### New Search

- 30 exp Drug Toxicity/ (26554)
- 31 exp Drug Hypersensitivity/ (32542)
- 32 Medication Errors/ (8565)
- 33 Street Drugs/ (6438)
- 34 Substance-Related Disorders/ (68818)
- 35 Drug Therapy/ (29261)
- 36 exp Pharmaceutical Preparations/ (533767)
- 37 or/33-36 (622214)
- 38 mo.fs. [Mortality] (344007)
- 39 ae.fs. [Adverse Effects] (1166547)

40 co.fs. [Complications] (1400771)  
41 or/38-40 (2673147)  
42 37 and 41 (105850)  
43 exp "diseases (non mesh)"/ (10168740)  
44 ci.fs. [chemically induced] (435615)  
45 43 and 44 (431654)  
46 adverse drug.tw. (8569)  
47 Adverse Drug Reaction Reporting Systems/ (4520)  
48 ((drug? or medication?) adj10 (error? or toxic\$ or complication? or reaction? or ADEs or adverse effect? or mortality or adverse event?)).tw. (70379)  
49 or/30-32,42,45-48 (602061)  
50 "International Classification of Diseases"/ (3301)  
51 (ICD-10 or ICD10).tw. (4312)  
52 (Classification of Diseases adj15 10\$).tw. (848)  
53 or/50-52 (7208)  
54 49 and 53 (233)  
55 54 not 27 (127) [removing previous search]  
56 limit 55 to English language (109)  
57 55 not 56 (42)
