# Supplementary material for: ICD-10 codes used to identify adverse drug events in administrative data: a systematic review
Source: PubMed Central journal article supplement — J Am Med Inform Assoc. 2013 Nov 12;21(3):547–57. doi: 10.1136/amiajnl-2013-002116 (PMC3994866; doi:10.1136/amiajnl-2013-002116), 2013-11-12
Supplement: amiajnl-2013-002116-s3.pdf [file amiajnl-2013-002116-s3.pdf]

## APPENDIX B. ICD-10 Code Sets used to Identify ADEs or ADRs in Administrative Data.

When a code as listed as parent code or code category (*i.e.*, K25), this indicates that all subcodes were used by the authors listed, and the causality ratings identified by Stausberg et al.<sup>21, 22</sup> for all subcodes were the same. The number of subcodes is indicated in the column “No. subcodes”. If only some of the subcodes were used by some authors, the subcode and authors are listed after the parent code category. When we encountered indicating adverse drug events that were specific to a national extension of the ICD-10 coding dictionary, we listed the parent code in the Table, and the national extension and subcodes in footnotes.

| Code               | No. sub-codes | Description                                                     | Authors using the code               | Causality Rating |
|--------------------|---------------|-----------------------------------------------------------------|--------------------------------------|------------------|
| A04.7              |               | Enterocolitis due to <i>Clostridium difficile</i>               | 21, 22, 30, 38, 42, 44               | C                |
| A80.0              |               | Acute paralytic poliomyelitis, vaccine-associated               | 29                                   | V                |
| D50.0              |               | Iron deficiency anemia secondary to blood loss (chronic)        | 28                                   | E                |
| D52.1              |               | Drug-induced folate deficiency anemia                           | 21, 22, 29, 36, 38, 52, 58           | A1               |
| D59.0              |               | Drug-induced autoimmune hemolytic anemia                        | 21-24, 29, 34-36, 38, 40, 58         | A1               |
| D59.2              |               | Drug-induced non autoimmune hemolytic anemia                    | 21-23, 29, 34-36, 38, 40, 52, 58     | A1               |
| D61.1 <sup>1</sup> |               | Drug-induced aplastic anaemia                                   | 21-23, 29, 34-36, 38, 40, 52, 57, 58 | A1               |
| D61.9              |               | Aplastic Anemia, unspecified                                    | 38, 42                               | E                |
| D62                | 1             | Acute post-hemorrhagic anemia                                   | 28, 38                               | D                |
| D64.2              |               | Secondary sideroblastic anaemia due to drugs and toxins         | 21, 22, 29, 38, 58                   | A2               |
| D65                | 1             | Disseminated Intravascular Coagulation (defibrination syndrome) | 28                                   | E                |
| D68.3              |               | Hemorrhagic disorder due to circulating anticoagulants          | 28, 51, 52, 57                       | A1               |
| D68.4              |               | Acquired coagulation factor deficiency                          | 46, 52                               | E                |
| D68.8              |               | Other specified coagulation defects                             | 52                                   | E                |
| D68.9              |               | Coagulation defect, unspecified                                 | 28, 46, 52                           | E                |
| D69                | 9             | Purpura and other haemorrhagic conditions                       | 21, 22, 24, 38                       | C                |
| D69.5 <sup>2</sup> |               | Secondary thrombocytopenia                                      | 21, 22, 24, 27, 38                   | C                |
| D69.6              |               | Thrombocytopenia, unspecified                                   | 21, 22, 24, 27, 38                   | D                |
| D69.9              |               | Hemorrhagic condition, unspecified                              | 21, 22, 24, 28, 38                   | E                |
| D70 <sup>3</sup>   | 1             | Agranulocytosis                                                 | 21, 29, 38, 42, 51, 57               | D                |

<sup>1</sup> D61.1 is split into D61.10 D61.18 and D61.19 in ICD-10-GM 2008, all of which were assigned an A1 causality rank.<sup>33,34</sup>

<sup>2</sup> D69.5 is split into D61.52 (A1 causality rating), D69.53 (A1 causality rating), D69.57 (C causality rating), D69.58 (C causality rating) and D69.59 (C causality rating) in ICD-10-GM 2008.<sup>33,34</sup>

<sup>3</sup> D70 is split into D70.10, D70.11, D70.12, D70.18 and D70.19 in ICD-10-GM 2008 which were assigned an A1 causality rank.<sup>33,34</sup>

|                    |    |                                                                                                   |                              |    |
|--------------------|----|---------------------------------------------------------------------------------------------------|------------------------------|----|
| E03.2              |    | Hypothyroidism due to medicaments and other exogenous substances                                  | 21-23, 29, 34-36, 38, 40     | A2 |
| E06.4              |    | Drug-induced thyroiditis                                                                          | 21, 22, 29, 36, 38, 52       | A1 |
| E15                | 1  | Nondiabetic hypoglycemic coma                                                                     | 21, 22, 38                   | C  |
| E16.0              |    | Drug-induced hypoglycaemia without coma                                                           | 21, 22, 29, 36, 38, 52       | A1 |
| E23.1              |    | Drug-induced hypopituitarism                                                                      | 21, 22, 29, 36, 38, 52       | A1 |
| E24.2              |    | Drug-induced Cushing syndrome                                                                     | 21, 22, 29, 36, 38, 52       | A1 |
| E27.3              |    | Drug-induced adrenocortical insufficiency                                                         | 21-23, 29, 34-36, 38, 40, 52 | A1 |
| E66.1 <sup>4</sup> |    | Drug-induced obesity                                                                              | 21, 22, 29, 36, 38           | A1 |
| E86                | 1  | Volume depletion                                                                                  | 21, 22, 38                   | E  |
| E87                | 9  | Other disorders of fluid, electrolyte and acid-base balance                                       | 21, 22, 38                   | E  |
| E87.0              |    | Hyperosmolality and hypernatremia                                                                 | 21, 22, 38                   | E  |
| E87.1              |    | Hypoosmolality and hyponatremia                                                                   | 21, 22, 38, 51               | E  |
| E87.2              |    | Acidosis                                                                                          | 21, 22, 38                   | E  |
| E87.3              |    | Alkalosis                                                                                         | 21, 22, 38                   | E  |
| E87.4              |    | Mixed disorder of acid-base balance                                                               | 21, 22, 38                   | E  |
| E87.5              |    | Hyperkalemia                                                                                      | 21, 22, 38                   | E  |
| E87.6              |    | Hypokalemia                                                                                       | 21, 22, 38, 51               | E  |
| E87.7              |    | Fluid overload                                                                                    | 21, 22, 38                   | E  |
| E87.8              |    | Other disorders of electrolyte and fluid balance, not elsewhere classified                        | 21, 22, 38                   | E  |
| F05                | 4  | Delirium, not induced by alcohol and other psychoactive substances                                | 52                           | E  |
| F11 <sup>5</sup>   | 10 | Mental and behavioural disorders due to use of opioids                                            | 21, 22, 29, 34, 35, 38, 40   | A2 |
| F13 <sup>6</sup>   | 10 | Mental and behavioural disorders due to use of sedatives or hypnotics                             | 21, 22, 29, 34-36, 38, 40    | A2 |
| F15 <sup>6</sup>   | 10 | Mental and behavioural disorders due to use of other stimulants, including caffeine               | 21, 22, 29, 38               | A2 |
| F16 <sup>6</sup>   | 10 | Mental and behavioural disorders due to use of hallucinogens                                      | 29, 38                       | E  |
| F19 <sup>6</sup>   | 10 | Mental and behavioral disorders due to multiple drug use and use of other psychoactive substances | 22, 29, 34-36, 38, 40, 42    | A2 |
| F52                | 10 | Sexual dysfunction, not caused by organic disorder or disease                                     | 21, 22, 38                   | D  |
| F55 <sup>6</sup>   | 1  | Abuse of non-dependence-producing substances                                                      | 21, 22, 38                   | B2 |
| G04.0              |    | Acute disseminated encephalitis                                                                   | 29, 38                       | E  |
| G21.0              |    | Malignant neuroleptic syndrome                                                                    | 21-23, 29, 34-36, 38, 40     | A1 |
| G21.1              |    | Other drug-induced secondary parkinsonism                                                         | 21-23, 29, 34-36, 38, 40, 52 | A1 |

<sup>4</sup> E66.1 is split into E66.10, E66.11, E66.12 and E66.19 in ICD-10-GM 2008 which were assigned the A1 causality rank.<sup>33,34</sup>

<sup>5</sup> Will include disorders due to illicit drug use.

<sup>6</sup> F.55 is split into 9 subcodes in ICD-10 GM 2008, all of which were assigned the B2 causality rank.<sup>33,34</sup>

|                    |   |                                                       |                                |    |
|--------------------|---|-------------------------------------------------------|--------------------------------|----|
| G21.2              |   | Secondary parkinsonism due to other external agents   | 21, 22, 38                     | A2 |
| G24.0              |   | Drug-induced dystonia                                 | 21-23, 29, 34-36, 38, 40, 52   | A1 |
| G25.0              |   | Essential tremor                                      | 23, 35                         | A1 |
| G25.1              |   | Drug-induced tremor                                   | 21, 22, 29, 34, 36, 38, 40, 52 | A1 |
| G25.3              |   | Myoclonus                                             | 29, 38                         | E  |
| G25.4              |   | Drug-induced chorea                                   | 21-23, 29, 34-36, 38, 40, 52   | A1 |
| G25.6              |   | Drug-induced tics and other tics of organic origin    | 21-23, 29, 34-36, 38, 40       | A1 |
| G40.5              |   | Special epileptic syndromes                           | 29, 38                         | E  |
| G44.4              |   | Drug-induced headache, not elsewhere classified       | 21, 22, 29, 36, 38, 52         | A1 |
| G62.0              |   | Drug-induced polyneuropathy                           | 21, 22, 29, 33, 36, 38, 52     | A1 |
| G71.1              |   | Myotonic disorders                                    | 29, 38                         | E  |
| G72.0              |   | Drug-induced myopathy                                 | 21-23, 29, 34-36, 38, 40, 52   | A1 |
| G95.8              |   | Other specified diseases of spinal cord               | 29, 38                         | E  |
| H11.3              |   | Conjunctival hemorrhage                               | 28                             | E  |
| H21.0              |   | Hyphaema                                              | 28                             | E  |
| H26.3              |   | Drug-induced cataract                                 | 21, 22, 29, 36, 38             | A1 |
| H31.3              |   | Choroidal hemorrhage and rupture                      | 28                             | E  |
| H35.6              |   | Retinal hemorrhage                                    | 28                             | E  |
| H40.6              |   | Glaucoma secondary to drugs                           | 21, 22, 29, 38                 | A1 |
| H43.1              |   | Vitreous hemorrhage                                   | 28                             | E  |
| H53                | 9 | Visual disturbances                                   | 21, 22, 38                     | D  |
| H91.0              |   | Ototoxic hearing loss                                 | 21-23, 34-36, 38, 40           | C  |
| H92.2              |   | Otorrhagia                                            | 28                             | E  |
| I15.8 <sup>7</sup> |   | Other secondary hypertension                          | 21, 22, 38                     | D  |
| I15.9              |   | Secondary hypertension, unspecified                   | 21, 22, 38                     | E  |
| I26                | 2 | Pulmonary embolism                                    | 21, 22, 38                     | E  |
| I31.2              |   | Haemopericardium, not elsewhere classified            | 28                             | E  |
| I42.7              |   | Cardiomyopathy due to drugs and other external agents | 21-23, 29, 34-36, 38, 40       | A2 |
| I44                | 8 | Atrioventricular and left bundle-branch block         | 21, 22, 38                     | E  |
| I45.8              |   | Other specified conduction disorders                  | 21, 22, 38                     | E  |
| I46.1              |   | Sudden cardiac death, so described                    | 31                             | E  |
| I47.2              |   | Ventricular tachycardia                               | 21, 22, 31, 38                 | E  |
| I49.0              |   | Ventricular fibrillation and flutter                  | 31                             | U  |

<sup>7</sup> Stausberg et al. used I15.81 which exists in the ICD-10-GM only and was assigned a D causality rank.<sup>33,34</sup>

|       |    |                                                                              |                                |    |
|-------|----|------------------------------------------------------------------------------|--------------------------------|----|
| I60   | 10 | Subarachnoid hemorrhage                                                      | 28                             | E  |
| I61   | 9  | Intracerebral hemorrhage                                                     | 21, 22, 28, 38                 | E  |
| I62   | 3  | Other nontraumatic intracranial haemorrhage                                  | 28                             |    |
| I80   | 6  | Phlebitis and thrombophlebitis                                               | 21, 22, 38                     | E  |
| I85.0 |    | Esophageal varices with bleeding                                             | 28                             | U  |
| I95   | 5  | Hypotension                                                                  | 52                             | E  |
| I95.2 |    | Hypotension due to drugs                                                     | 21, 22, 29, 36, 38, 51, 52, 57 | AI |
| J38.5 |    | Laryngeal spasm                                                              | 21, 22, 38                     | E  |
| J45.0 |    | Predominantly allergic asthma                                                | 21, 22, 38                     | E  |
| J45.1 |    | Nonallergic asthma                                                           | 21, 22, 38                     | D  |
| J45.8 |    | Mixed asthma                                                                 | 21, 22, 38                     | E  |
| J46   | 1  | Status asthmaticus                                                           | 32                             | U  |
| J70.2 |    | Acute drug-induced interstitial lung disorders                               | 21-23, 29, 34-36, 38, 40       | AI |
| J70.3 |    | Chronic drug-induced interstitial lung disorders                             | 21-23, 29, 34-36, 38, 40       | AI |
| J70.4 |    | Drug-induced interstitial lung disorders, unspecified                        | 21-23, 29, 33-36, 38, 40, 52   | AI |
| J80   | 1  | Adult respiratory distress syndrome                                          | 46                             | U  |
| J81   | 1  | Pulmonary oedema                                                             | 21, 22, 38                     | E  |
| K25   | 9  | Gastric Ulcer                                                                | 21, 22, 38, 42                 | D  |
| K25.0 |    | Gastric Ulcer, acute with hemorrhage                                         | 21, 22, 28, 38, 42             | D  |
| K25.2 |    | Gastric ulcer, acute with both hemorrhage and perforation                    | 21, 22, 28, 38, 42             | D  |
| K26   | 9  | Duodenal Ulcer                                                               | 28-30, 38                      | E  |
| K26.0 |    | Duodenal Ulcer, Acute with hemorrhage                                        | 21, 22, 28, 36, 38, 42         | D  |
| K26.2 |    | Duodenal ulcer, acute with both hemorrhage and perforation                   | 21, 22, 28, 38, 42             | D  |
| K26.4 |    | Duodenal ulcer, chronic or unspecified with hemorrhage                       | 21, 22, 28, 38, 42             | D  |
| K26.6 |    | Duodenal ulcer, Chronic or unspecified with both haemorrhage and perforation | 21, 22, 28, 38, 42             | D  |
| K27   | 9  | Peptic ulcer, site unspecified                                               | 28-30, 38                      | E  |
| K27.0 |    | Peptic Ulcer, site unspecified, acute with hemorrhage                        | 21, 22, 28, 38, 42             | D  |
| K27.2 |    | Peptic ulcer, site unspecified, acute with both hemorrhage and perforation   | 21, 22, 28, 38, 42             | D  |
| K27.4 |    | Peptic ulcer, site unspecified, chronic or unspecified with hemorrhage       | 21, 22, 28, 38, 42             | D  |
| K28   | 9  | Gastrojejunal ulcer                                                          | 21, 22, 38                     | D  |
| K28.0 |    | Gastrojejunal ulcer, acute with hemorrhage                                   | 21, 22, 28, 38                 | D  |
| K28.2 |    | Gastrojejunal ulcer, acute with both hemorrhage and perforation              | 21, 22, 28, 38                 | D  |
| K28.4 |    | Gastrojejunal ulcer, chronic or unspecified with hemorrhage                  | 21, 22, 28, 38                 | D  |
| K29.0 |    | Acute hemorrhagic gastritis                                                  | 21, 22, 28, 38                 | D  |
| K52.1 |    | Toxic gastroenteritis and colitis                                            | 21, 22, 38, 57                 | C  |

|                    |    |                                                                  |                                            |    |
|--------------------|----|------------------------------------------------------------------|--------------------------------------------|----|
| K52.8              |    | Other specified noninfective gastroenteritis and colitis         | 30                                         | U  |
| K52.9              |    | Non-Infective gastroenteritis and colitis, unspecified*          | 51                                         | D  |
| K62.5              |    | Hemorrhage of anus and rectum                                    | 28                                         | E  |
| K66.1              |    | Hemoperitoneum                                                   | 28                                         | E  |
| K71                | 10 | Toxic liver disease                                              | 21-23, 29, 34-36, 38, 40, 58, 60           | E  |
| K71.1              |    | Toxic liver disease with hepatic necrosis                        | 21-23, 29, 34-36, 40, 46, 58, 60           | C  |
| K71.2              |    | Toxic liver disease with acute hepatitis                         | 21-23, 29, 34-36, 40, 46, 58, 60           | C  |
| K71.6              |    | Toxic liver disease with hepatitis, not elsewhere classified     | 21-23, 29, 34-36, 40, 46, 58, 60           | C  |
| K71.9              |    | Toxic liver disease, unspecified                                 | 21-23, 29, 34-36, 40, 46, 58, 60           | C  |
| K72.0              |    | Acute and subacute hepatic failure                               | 21, 22, 38, 46                             | E  |
| K72.9              |    | Hepatic failure, unspecified                                     | 46                                         | E  |
| K76.7              |    | Hepatorenal syndrome                                             | 46                                         | E  |
| K85.3 <sup>8</sup> |    | Drug-induced acute pancreatitis                                  | 21, 22, 38                                 | A1 |
| K92.0              |    | Hematemesis                                                      | 28                                         | E  |
| K92.1              |    | Melena                                                           | 28                                         | E  |
| K92.2              |    | Gastrointestinal hemorrhage, unspecified                         | 21, 22, 28, 38                             | E  |
| L10.5              |    | Drug-induced pemphigus                                           | 21, 22, 24, 29, 38                         | A1 |
| L20                | 3  | Atopic dermatitis                                                | 52, 61                                     | U  |
| L21                | 4  | Seborrhoeic dermatitis                                           | 52                                         | E  |
| L21.0              |    | Seborrhoea capitis                                               | 52, 61                                     | E  |
| L21.1              |    | Seborrhoeic infantile dermatitis                                 | 52, 61                                     | E  |
| L23.3              |    | Allergic contact dermatitis due to drugs in contact with skin    | 21, 22, 24, 29, 36, 38, 52, 58             | A2 |
| L24.4              |    | Irritant contact dermatitis due to drugs in contact with skin    | 21, 22, 29, 36, 38, 52, 58                 | A2 |
| L25.1              |    | Unspecified contact dermatitis due to drugs in contact with skin | 21, 22, 24, 29, 36, 38, 52, 58             | A2 |
| L26                | 1  | Exfoliative dermatitis                                           | 52                                         | E  |
| L27                | 5  | Dermatitis due to substances taken internally                    | 52                                         | A2 |
| L27.0              |    | Generalized skin eruptions due to drugs and medicaments          | 21, 22, 24, 29, 33, 36, 38, 51, 52, 57, 58 | A2 |
| L27.1              |    | Localized skin eruptions due to drugs and medicaments            | 22, 24, 29, 36, 38, 52, 57, 58             | A2 |
| L27.8              |    | Dermatitis due to other substances taken internally              | 21, 22, 38, 52                             | A2 |
| L27.9              |    | Dermatitis due to unspecified substance taken internally         | 21, 22, 38, 52                             | A2 |
| L28                | 3  | Lichen simplex chronicus and prurigo                             | 52                                         | E  |
| L29                | 6  | Pruritus                                                         | 21, 22, 38, 52                             | U  |
| L30                | 8  | Other dermatitis                                                 | 52                                         | E  |

<sup>8</sup> Stausberg et al. used K85.30 and K85.31 which exist in ICD-10-GM only and were assigned A1 in the causality rank. <sup>33,34</sup>

|                     |   |                                                                                 |                                   |    |
|---------------------|---|---------------------------------------------------------------------------------|-----------------------------------|----|
| L43.2               |   | Lichenoid drug reaction                                                         | 21, 22, 29, 38, 52, 58            | A1 |
| L50.0               |   | Allergic urticaria                                                              | 21, 22, 24, 38                    | D  |
| L51                 | 5 | Erythema multiforme                                                             | 21, 22, 38                        | C  |
| L51.1               |   | Bullous erythema multiforme/Stevens–Johnson syndrome                            | 21, 22, 24                        | C  |
| L51.2 <sup>9</sup>  |   | Toxic epidermal necrolysis (Lyell’s Syndrome)                                   | 21, 22, 24, 36                    | C  |
| L51.8               |   | Other erythema multiforme                                                       | 21, 22, 24                        | C  |
| L51.9               |   | Erythema multiforme, unspecified                                                | 21, 22, 24                        | C  |
| L52                 | 1 | Erythema nodosum                                                                | 24, 38                            | E  |
| L56.0               |   | Drug phototoxic response                                                        | 21-23, 29, 34-36, 38, 40, 52      | A1 |
| L56.1               |   | Drug photoallergic response                                                     | 21-24, 29, 34-36, 38, 40, 52      | A1 |
| L56.2               |   | Photocontact dermatitis (berloque dermatitis)                                   | 21, 22, 38                        | C  |
| L64.0               |   | Drug-induced androgenic alopecia                                                | 21, 22, 29, 38                    | A1 |
| L71.0               |   | Perioral dermatitis                                                             | 24, 38                            | E  |
| M02.2               |   | Postimmunization arthropathy                                                    | 29, 36                            | V  |
| M10.2 <sup>10</sup> |   | Drug-induced gout                                                               | 21-23, 29, 34-36, 38, 40, 52      | A1 |
| M25.0               |   | Hemarthrosis                                                                    | 28                                | E  |
| M31.0               |   | Hypersensitivity angiitis                                                       | 24, 38                            | E  |
| M32.0               |   | Drug-induced systemic lupus erythematosus                                       | 21, 22, 24, 29, 34-36, 38, 40     | A1 |
| M34.2               |   | Systemic sclerosis induced by drugs and chemicals                               | 21-23, 29, 34-36, 38, 40          | A2 |
| M62.8               |   | Other specified disorders of muscle                                             | 38, 42                            | E  |
| M80.4 <sup>11</sup> |   | Drug-induced osteoporosis with pathological fracture                            | 21, 22, 29, 36, 38                | A1 |
| M81.4 <sup>12</sup> |   | Drug-induced osteoporosis without pathological fracture                         | 21, 22, 29, 36, 38, 57            | A1 |
| M83.5 <sup>12</sup> |   | Other drug-induced osteomalacia in adults                                       | 21, 22, 36, 38                    | A1 |
| M87.1 <sup>12</sup> |   | Osteonecrosis due to drugs                                                      | 21, 22, 29, 36, 38                | A1 |
| N14.0               |   | Analgesic nephropathy                                                           | 21-23, 29, 34, 35, 38, 40, 42, 52 | A1 |
| N14.1               |   | Nephropathy induced by other drugs, medicaments and biological substances       | 21-23, 29, 33-36, 38, 40, 42, 52  | A2 |
| N14.2               |   | Nephropathy induced by unspecified drugs, medicaments and biological substances | 21-23, 29, 34-36, 38, 40, 42, 52  | A2 |
| N14.3               |   | Nephropathy induced by heavy metals                                             | 21, 22, 34, 38, 40, 42            | A2 |
| N14.4               |   | Toxic nephropathy, not elsewhere classified                                     | 21, 22, 34, 38, 40, 42            | A2 |
| N17                 | 5 | Acute renal failure                                                             | 21, 22, 38                        | D  |
| N18 <sup>12</sup>   | 6 | Chronic kidney disease                                                          | 21, 22, 38                        | D  |

<sup>9</sup> Stausberg et al. used codes L51.20 and L51.21 which exist in ICD-10-GM only and were assigned a C causality rank.<sup>33,34</sup>

<sup>10</sup> Stausberg et al. used codes M10.20-M10.29 which exist in ICD-10-GM only and were assigned an A1 causality rank.<sup>33,34</sup>

<sup>11</sup> Stausberg et al. used codes M80.40-49, M81.40-49, M83.50-59 and M87.10-19 which exist in ICD-10-GM only and were assigned an A1 causality rank.<sup>33,34</sup>

|       |   |                                                                                                    |                |    |
|-------|---|----------------------------------------------------------------------------------------------------|----------------|----|
| N19   | 1 | Unspecified kidney failure                                                                         | 21, 22, 38     | D  |
| N42.1 |   | Congestion and hemorrhage of prostate                                                              | 28             | E  |
| N62   | 1 | Hypertrophy of breast                                                                              | 21, 22, 38     | E  |
| N83.6 |   | Hemosalpinx                                                                                        | 28             | E  |
| N83.7 |   | Hematoma of broad ligament                                                                         | 28             | E  |
| N85.7 |   | Hematometra                                                                                        | 28             | E  |
| N89.7 |   | Hematocolpos                                                                                       | 28             | E  |
| N92.1 |   | Excessive and frequent menstruation with irregular cycle                                           | 28             | U  |
| N92.2 |   | Excessive menstruation at puberty                                                                  | 28             | U  |
| N92.3 |   | Ovulation bleeding                                                                                 | 28             | U  |
| N92.4 |   | Excessive bleeding in the premenopausal period                                                     | 28             | U  |
| N92.6 |   | Irregular menstruation, unspecified                                                                | 28             | U  |
| N93   | 3 | Other abnormal uterine and vaginal bleeding                                                        | 28             | U  |
| N95.0 |   | Postmenopausal bleeding                                                                            | 28             | U  |
| N95.3 |   | States associated with artificial menopause                                                        | 28             | E  |
| N99.0 |   | Postprocedural renal failure                                                                       | 21, 22, 38     | C  |
| O26.6 |   | Liver disorders in pregnancy, childbirth and the puerperium                                        | 21, 22, 38     | D  |
| O35.5 |   | Maternal care for (suspected) damage to fetus by drugs                                             | 21, 22, 38     | A2 |
| O74.2 |   | Cardiac complications of anaesthesia during labour and delivery                                    | 21, 22, 38, 45 | C  |
| O74.3 |   | Central nervous system complications of anaesthesia during labour and delivery                     | 21, 22, 38, 45 | C  |
| O74.4 |   | Toxic reaction to local anesthetic during labour and delivery                                      | 21, 22, 38, 45 | A1 |
| O74.6 |   | Other complications of spinal and epidural anesthesia during labour and delivery                   | 21, 22, 38, 45 | D  |
| P04.0 |   | Fetus and newborn affected by maternal anaesthesia and analgesia in pregnancy, labour and delivery | 21, 22, 38     | A1 |
| P04.1 |   | Fetus and newborn affected by other maternal medication                                            | 21, 22, 38     | A1 |
| P04.4 |   | Fetus and newborn affected by maternal use of drugs of addiction                                   | 21, 22, 38     | A2 |
| P58.4 |   | Neonatal jaundice due to drugs or toxins transmitted from mother or given to newborn               | 21, 22, 38     | A2 |
| P93   | 1 | Reactions and intoxications due to drugs administered to fetus and newborn                         | 21, 22, 38     | A2 |
| P96.1 |   | Neonatal withdrawal symptoms from maternal use of drugs of addiction                               | 21, 22, 38     | A2 |
| P96.2 |   | Withdrawal symptoms from therapeutic use of drugs in newborn                                       | 21, 22, 38     | A1 |
| Q86.1 |   | Fetal hydantoin syndrome                                                                           | 21, 22, 38     | A1 |
| Q86.2 |   | Dysmorphism due to warfarin                                                                        | 21, 22, 38     | A1 |
| R00.1 |   | Bradycardia, unspecified                                                                           | 21, 22, 38, 51 | E  |
| R04.0 |   | Epistaxis                                                                                          | 28             | E  |

<sup>12</sup> Stausberg et al. used the subcodes N18.80-84, N18.89, N18.90 and N18.91 which exist in ICD-10-GM only and were assigned a D causality rank.<sup>33,34</sup>

|       |    |                                                                                                 |                            |    |
|-------|----|-------------------------------------------------------------------------------------------------|----------------------------|----|
| R04.1 |    | Hemorrhage from throat                                                                          | 28                         | E  |
| R04.8 |    | Hemorrhage from other sites in respiratory passage                                              | 28                         | E  |
| R04.9 |    | Hemorrhage from respiratory passage, unspecified                                                | 28                         | E  |
| R06.0 |    | Dyspnea                                                                                         | 21, 22, 38                 | E  |
| R11   | 1  | Nausea and vomiting                                                                             | 21, 22, 38, 51, 52, 57     | E  |
| R17   | 1  | Unspecified jaundice                                                                            | 21, 22, 38, 46             | E  |
| R20   | 5  | Disturbances of skin sensation                                                                  | 52                         | E  |
| R21   | 1  | Rash and other nonspecific skin eruption                                                        | 21, 22, 38, 52             | E  |
| R34   | 1  | Anuria and oliguria                                                                             | 21, 22, 38                 | E  |
| R23   | 6  | Other skin changes                                                                              | 52                         | E  |
| R23.3 |    | Spontaneous ecchymoses                                                                          | 28, 52                     | E  |
| R31   | 1  | Unspecified hematuria                                                                           | 28                         | E  |
| R40   | 3  | Somnolence, stupor and coma                                                                     | 52                         | E  |
| R41   | 5  | Other symptoms and signs involving cognitive functions and awareness                            | 52                         | E  |
| R41.0 |    | Disorientation, unspecified                                                                     | 21, 22, 38, 52             | E  |
| R42   | 1  | Dizziness and giddiness                                                                         | 21, 22, 38                 | E  |
| R44   | 5  | Other symptoms and signs involving general sensations and perceptions                           | 52                         | U  |
| R44.0 |    | Auditory hallucinations                                                                         | 21, 22, 38, 52             | E  |
| R44.1 |    | Visual hallucinations                                                                           | 21, 22, 38, 52             | E  |
| R44.2 |    | Other hallucinations                                                                            | 21, 22, 38, 52             | E  |
| R44.3 |    | Hallucinations, unspecified                                                                     | 21, 22, 38, 52             | E  |
| R50.2 |    | Drug-induced fever                                                                              | 21, 22, 24, 38             | A1 |
| R51   | 1  | Headache                                                                                        | 21, 22, 38                 | E  |
| R55   | 1  | Syncope and collapse                                                                            | 21, 22, 38, 51             | E  |
| R58   | 1  | Hemorrhage, not elsewhere classified                                                            | 21, 22, 28, 38             | E  |
| R73.9 |    | Hyperglycemia, unspecified                                                                      | 21, 22, 38                 | E  |
| R74.0 |    | Elevation of levels of transaminase and lactic acid dehydrogenase (LDH)                         | 21, 22, 38                 | E  |
| S06.4 |    | Epidural hemorrhage                                                                             | 28                         | E  |
| S06.5 |    | Traumatic subdural hemorrhage                                                                   | 28                         | U  |
| S06.6 |    | Traumatic subarachnoid hemorrhage                                                               | 28                         | U  |
| S06.8 |    | Other intracranial injuries                                                                     | 28                         | U  |
| T36   | 10 | Poisoning by systemic antibiotics                                                               | 21, 22, 37, 38, 49, 53, 58 | B1 |
| T37   | 8  | Poisoning by other systemic anti-infectives and antiparasitics                                  | 21, 22, 37, 38, 49, 53, 58 | B1 |
| T38   | 10 | Poisoning by hormones and their synthetic substitutes and antagonists, not elsewhere classified | 21, 22, 37, 38, 49, 53, 58 | B1 |
| T39   | 7  | Poisoning by nonopioid analgesics, antipyretics and antirheumatics                              | 21, 22, 37, 38, 49, 53, 58 | B1 |



|       |    |                                                                                                                                           |                                              |    |
|-------|----|-------------------------------------------------------------------------------------------------------------------------------------------|----------------------------------------------|----|
| T39.1 |    | Poisoning by 4-Aminophenol derivatives                                                                                                    | 21, 22, 37, 46, 49, 53, 55, 58               | B1 |
| T40   | 10 | Poisoning by narcotics and psychodysleptics [hallucinogens]                                                                               | 21, 22, 37, 38, 49, 53, 58                   | B1 |
| T40.3 |    | Poisoning by Methadone                                                                                                                    | 21, 22, 37, 47, 49, 53, 58                   | B1 |
| T41   | 6  | Poisoning by anaesthetics and therapeutic gases                                                                                           | 21, 22, 37, 38, 49, 53, 58                   | B1 |
| T42   | 9  | Poisoning by antiepileptic, sedative-hypnotic and antiparkinsonism drugs                                                                  | 21, 22, 37, 38, 49, 53, 57, 58               | B1 |
| T43   | 9  | Poisoning by psychotropic drugs, not elsewhere classified                                                                                 | 21, 22, 37, 38, 42, 49, 53, 58               | B1 |
| T44   | 10 | Poisoning by drugs primarily affecting the autonomic nervous system                                                                       | 21, 22, 37, 38, 49, 53, 58                   | B1 |
| T45   | 10 | Poisoning by primarily systemic and haematological agents, not elsewhere classified                                                       | 21, 22, 37, 38, 49, 53, 58                   | B1 |
| T46   | 10 | Poisoning by agents primarily affecting the cardiovascular system                                                                         | 21, 22, 37, 38, 49, 53, 57, 58               | B1 |
| T46.0 |    | Cardiac-stimulant glycosides and drugs of similar action                                                                                  | 21, 22, 37, 38, 49, 53, 57-59                | B1 |
| T47   | 10 | Poisoning by agents primarily affecting the gastrointestinal system                                                                       | 21, 22, 37, 38, 49, 53, 58                   | B1 |
| T48   | 8  | Poisoning by agents primarily acting on smooth and skeletal muscles and the respiratory system                                            | 21, 22, 37, 38, 49, 53, 58                   | B1 |
| T49   | 10 | Poisoning by topical agents primarily affecting skin and mucous membrane and by ophthalmological, otorhinolaryngological and dental drugs | 21, 22, 37, 38, 49, 53, 58                   | B1 |
| T50   | 10 | Poisoning by diuretics and other and unspecified drugs, medicaments and biological substances                                             | 21, 22, 37, 38, 49, 53, 58                   | B1 |
| T78   | 7  | Adverse effects, not elsewhere classified                                                                                                 | 32                                           | A2 |
| T78.2 |    | Anaphylactic shock, unspecified                                                                                                           | 21, 22, 32, 38, 58                           | A2 |
| T78.3 |    | Angioneurotic edema                                                                                                                       | 21, 22, 32, 38                               | A2 |
| T78.4 |    | Allergy, unspecified                                                                                                                      | 21, 22, 38                                   | A2 |
| T78.8 |    | Other adverse effects, not elsewhere classified                                                                                           | 21, 22, 38                                   | A2 |
| T78.9 |    | Adverse effect, unspecified                                                                                                               | 21, 22, 38                                   | A2 |
| T80.1 |    | Vascular complications following infusion, transfusion and therapeutic injection                                                          | 21, 22, 38                                   | A2 |
| T80.2 |    | Infections following infusion, transfusion and therapeutic injection                                                                      | 21, 22, 38                                   | A2 |
| T80.3 |    | ABO incompatibility reaction                                                                                                              | 21, 22, 38                                   | A2 |
| T80.4 |    | Rh incompatibility reaction                                                                                                               | 21, 22, 38                                   | A2 |
| T80.5 |    | Anaphylactic shock due to serum                                                                                                           | 21, 22, 24, 32, 36, 38                       | A2 |
| T80.6 |    | Complications following infusion, transfusion and therapeutic injection: other serum reactions                                            | 21, 22, 36, 38                               | A2 |
| T80.8 |    | Other complications following infusion, transfusion and therapeutic injection                                                             | 21, 22, 36, 38                               | A2 |
| T80.9 |    | Unspecified complication following infusion, transfusion and therapeutic injection                                                        | 21, 22, 36, 38                               | A2 |
| T81   | 10 | Complications of procedures, not elsewhere classified                                                                                     | 28                                           | U  |
| T88.0 |    | Infection following immunization                                                                                                          | 29, 36                                       | V  |
| T88.1 |    | Other complications following immunization, not elsewhere classified                                                                      | 24, 29, 36, 50                               | V  |
| T88.2 |    | Shock due to anaesthesia                                                                                                                  | 24, 29, 36, 38, 45, 52                       | E  |
| T88.3 |    | Malignant hyperthermia due to anaesthesia                                                                                                 | 21-23, 29, 34-36, 38, 40, 45, 52             | A1 |
| T88.5 |    | Other complications of anaesthesia                                                                                                        | 21, 22, 29, 38, 45, 52                       | D  |
| T88.6 |    | Anaphylactic shock due to adverse effect of correct drug or medicament properly administered                                              | 21-24, 29, 32-36, 38, 40, 41, 43, 50, 52, 61 | A2 |

|                     |    |                                                                                                                                                                                                               |                                                   |    |
|---------------------|----|---------------------------------------------------------------------------------------------------------------------------------------------------------------------------------------------------------------|---------------------------------------------------|----|
| T88.7               |    | Unspecified adverse event of drug or medicament                                                                                                                                                               | 21, 22, 24, 29, 34-36, 38, 40, 41, 43, 48, 50, 52 | A2 |
| T88.8               |    | Other specified complications of surgical and medical care, not elsewhere classified                                                                                                                          | 38                                                | E  |
| T88.9               |    | Complication of surgical and medical care, unspecified                                                                                                                                                        | 38                                                | E  |
| T96                 | 1  | Sequelae of poisoning by drugs, medicaments and biological substances                                                                                                                                         | 21, 22, 38                                        | B2 |
| X40                 | 1  | Accidental poisoning by and exposure to nonopioid analgesics, antipyretics and antirheumatics including acetaminophen                                                                                         | 14, 38, 46, 52, 53                                | B2 |
| X41                 | 1  | Accidental poisoning by and exposure to antiepileptic, sedative hypnotic, antiparkinsonism and psychotropic drugs, not elsewhere classified                                                                   | 14, 38, 42, 52, 53                                | B2 |
| X42                 | 1  | Accidental poisoning by and exposure to narcotics and psychodysleptics                                                                                                                                        | 14, 38, 42, 52, 53                                | B2 |
| X43                 | 1  | Accidental poisoning by and exposure to other drugs acting on the autonomic nervous system                                                                                                                    | 14, 38, 52, 53                                    | B2 |
| X44                 | 1  | Accidental poisoning by and exposure to other and unspecified drugs, medicaments, and biological substances                                                                                                   | 14, 38, 42, 52, 53                                | B2 |
| X45.5 <sup>13</sup> |    | Adverse effects of therapeutic use of 4-aminophenol derivatives                                                                                                                                               | 46                                                | B2 |
| Y10                 | 1  | Poisoning by and exposure to nonopioid analgesics, antipyretics and antirheumatics, undetermined intent                                                                                                       | 46                                                | B2 |
| Y12                 | 1  | Poisoning by and exposure to narcotics and psychodysleptics (hallucinogens), undetermined intent                                                                                                              | 21, 22, 38, 42                                    | E  |
| Y14                 | 1  | Poisoning by and exposure to other and unspecified drugs, medicaments, and biological substances, undetermined intent                                                                                         | 21, 22, 38, 42                                    | E  |
| Y40                 | 10 | Drugs, medicaments and biological substances causing adverse effects in therapeutic use - Systemic antibiotic                                                                                                 | 14, 26, 29, 34-36, 38-40, 49-54, 57, 58, 60       | A1 |
| Y41                 | 8  | Drugs, medicaments and biological substances causing adverse effects in therapeutic use - Other systemic anti-infectives and antiparasitics                                                                   | 14, 26, 29, 34-36, 38-40, 49-54, 57, 58, 60       | A1 |
| Y42                 | 10 | Drugs, medicaments and biological substances causing adverse effects in therapeutic use - Hormones and their synthetic substitutes and antagonists, not elsewhere classified                                  | 14, 26, 29, 34-36, 38-40, 49-54, 57, 58           | A1 |
| Y42.7               |    | Drugs, medicaments and biological substances causing adverse effects in therapeutic use - Hormones and their synthetic substitutes and antagonists, not elsewhere classified, Androgens and anabolic congener | 14, 26, 29, 34-36, 39, 40, 43, 49-54, 57, 58      | A1 |
| Y43                 | 9  | Drugs, medicaments and biological substances causing adverse effects in therapeutic use - Primarily systemic agents                                                                                           | 14, 26, 29, 34-36, 38-40, 49-54, 57, 58           | A1 |
| Y44                 | 9  | Drugs, medicaments and biological substances causing adverse effects in therapeutic use - Agents primarily affecting blood constituents                                                                       | 14, 26, 29, 34-36, 38-40, 49-54, 57, 58           | A1 |
| Y44.0               |    | Drugs, medicaments and biological substances causing adverse effects in therapeutic use - Agents primarily affecting blood constituents, Iron preparations and other anti-hypochromic-anaemia                 | 14, 26, 29, 34-36, 38-40, 48-54, 57, 58           | A1 |

<sup>13</sup> Used to identify acetaminophen poisoning.

|       |    |                                                                                                                                                                           |                                                     |    |
|-------|----|---------------------------------------------------------------------------------------------------------------------------------------------------------------------------|-----------------------------------------------------|----|
|       |    | preparations                                                                                                                                                              |                                                     |    |
| Y44.2 |    | Drugs, medicaments and biological substances causing adverse effects in therapeutic use - Agents primarily affecting blood constituents, Anticoagulants                   | 14, 26, 27, 29, 34-36, 38-40, 42, 44, 49-54, 57, 58 | A1 |
| Y45   | 8  | Drugs, medicaments and biological substances causing adverse effects in therapeutic use - Analgesics, antipyretics and anti-inflammatory drugs                            | 14, 26, 29, 34-36, 38-40, 45, 49-54, 57, 58         | A1 |
| Y45.5 |    | Drugs, medicaments and biological substances causing adverse effects in therapeutic use - Analgesics, antipyretics and anti-inflammatory drugs, 4-Aminophenol derivatives | 14, 26, 29, 34-36, 38-40, 45, 49-55, 57, 58         | A1 |
| Y46   | 9  | Drugs, medicaments and biological substances causing adverse effects in therapeutic use - Antiepileptics and antiparkinsonism drugs                                       | 14, 26, 29, 34-36, 38-40, 49-54, 57, 58             | A1 |
| Y47   | 8  | Drugs, medicaments and biological substances causing adverse effects in therapeutic use - Sedatives, hypnotics and antianxiety drugs                                      | 14, 26, 29, 34-36, 38-40, 49-54, 57, 58             | A1 |
| Y47.1 |    | Drugs, medicaments and biological substances causing adverse effects in therapeutic use - Sedatives, hypnotics and antianxiety drugs, Benzodiazepines                     | 14, 26, 29, 34-36, 38-40, 45, 49-54, 57, 58         | A1 |
| Y48   | 6  | Drugs, medicaments and biological substances causing adverse effects in therapeutic use - Anaesthetics and therapeutic gases                                              | 14, 26, 29, 34-36, 38-40, 45, 49-54, 57, 58         | A1 |
| Y48.1 |    | Drugs, medicaments and biological substances causing adverse effects in therapeutic use - Anaesthetics and therapeutic gases, Parenteral anaesthetics                     | 14, 26, 29, 34-36, 38-40, 45, 49-54, 57, 58         | A1 |
| Y48.2 |    | Drugs, medicaments and biological substances causing adverse effects in therapeutic use - Anaesthetics and therapeutic gases, Other and unspecified general anaesthetics  | 14, 26, 29, 34-36, 38-40, 45, 49-54, 57, 58         | A1 |
| Y48.3 |    | Drugs, medicaments and biological substances causing adverse effects in therapeutic use - Anaesthetics and therapeutic gases, Local anaesthetics                          | 14, 26, 29, 34-36, 38-40, 45, 49-54, 57, 58         | A1 |
| Y48.4 |    | Drugs, medicaments and biological substances causing adverse effects in therapeutic use - Anaesthetics and therapeutic gases, Anaesthetic, unspecified                    | 14, 26, 29, 34-36, 38-40, 45, 49-54, 57, 58         | A1 |
| Y49   | 10 | Drugs, medicaments and biological substances causing adverse effects in therapeutic use - Psychotropic drugs, not elsewhere classified                                    | 14, 26, 29, 34-36, 38-40, 49-54, 57, 58             | A1 |
| Y50   | 5  | Drugs, medicaments and biological substances causing adverse effects in therapeutic use - Central nervous system stimulants, not elsewhere classified                     | 14, 26, 29, 34-36, 38-40, 49-54, 57, 58             | A1 |
| Y51   | 10 | Drugs, medicaments and biological substances causing adverse effects in therapeutic use - Drugs primarily affecting the autonomic nervous system                          | 14, 26, 29, 34-36, 38-40, 49-54, 57, 58             | A1 |
| Y52   | 10 | Drugs, medicaments and biological substances causing adverse effects in therapeutic use - Agents primarily affecting the cardiovascular system                            | 14, 26, 29, 34-36, 38-40, 49-54, 57, 58             | A1 |
| Y53   | 10 | Drugs, medicaments and biological substances causing adverse effects in therapeutic use - Agents primarily affecting the gastrointestinal system                          | 14, 26, 29, 34-36, 38-40, 49-54, 57, 58             | A1 |
| Y54   | 10 | Drugs, medicaments and biological substances causing adverse effects in therapeutic use - Agents primarily affecting water-balance and mineral and uric acid metabolism   | 14, 26, 29, 34-36, 38-40, 49-54, 57, 58             | A1 |
| Y55   | 8  | Drugs, medicaments and biological substances causing adverse effects in therapeutic use - Agents                                                                          | 14, 26, 29, 34-36, 38-40, 49-54, 57, 58             | A1 |

|       |    |                                                                                                                                                                                                                                        |                                                     |    |
|-------|----|----------------------------------------------------------------------------------------------------------------------------------------------------------------------------------------------------------------------------------------|-----------------------------------------------------|----|
|       |    | primarily acting on smooth and skeletal muscles and the respiratory system                                                                                                                                                             |                                                     |    |
| Y55.1 |    | Drugs, medicaments and biological substances causing adverse effects in therapeutic use - Agents primarily acting on smooth and skeletal muscles and the respiratory system, Skeletal muscle relaxants [neuromuscular blocking agents] | 14, 26, 29, 34-36, 38-40, 45, 49-54, 57, 58         | A1 |
| Y56   | 10 | Drugs, medicaments and biological substances causing adverse effects in therapeutic use - Topical agents primarily affecting skin and mucous membrane and ophthalmological, otorhinolaryngological and dental drugs                    | 14, 26, 29, 34-36, 38-40, 49-54, 57, 58             | A1 |
| Y57   | 10 | Drugs, medicaments and biological substances causing adverse effects in therapeutic use -Other and unspecified drugs and medicaments                                                                                                   | 14, 26, 29, 34-36, 38-40, 49-54, 57, 58             | A1 |
| Y57.5 |    | Drugs, medicaments and biological substances causing adverse effects in therapeutic use -Other and unspecified drugs and medicaments, X-ray contrast media                                                                             | 14, 26, 29, 34-36, 38-41, 43, 49-54, 57, 58         | A1 |
| Y57.9 |    | Drugs, medicaments and biological substances causing adverse effects in therapeutic use -Other and unspecified drugs and medicaments, Drug or medicament, unspecified                                                                  | 14, 21, 22, 25, 26, 29, 34-36, 38-40, 49-54, 57, 58 | A2 |
| Y58   | 9  | Drugs, medicaments and biological substances causing adverse effects in therapeutic use - Bacterial vaccines                                                                                                                           | 14, 26, 29, 34-36, 38-40, 49-54, 57, 58, 79         | A1 |
| Y59   | 6  | Drugs, medicaments and biological substances causing adverse effects in therapeutic use - Other and unspecified vaccines and biological substances                                                                                     | 14, 26, 29, 34-36, 38-40, 49-54, 57, 58             | A1 |
| Y59.9 |    | Vaccine or biological substance, unspecified                                                                                                                                                                                           | 14, 21, 22, 26, 29, 34-36, 38-40, 49-54, 57, 58     | A2 |
| Y60.1 |    | Unintentional cut, puncture, perforation or haemorrhage during infusion or transfusion                                                                                                                                                 | 50                                                  | U  |
| Y60.2 |    | Unintentional cut, puncture, perforation or haemorrhage during kidney dialysis or other perfusion                                                                                                                                      | 50                                                  | U  |
| Y60.3 |    | Unintentional cut, puncture, perforation or haemorrhage during injection or immunization                                                                                                                                               | 50                                                  | U  |
| Y62.1 |    | Failure of sterile precautions during infusion or transfusion                                                                                                                                                                          | 50                                                  | U  |
| Y62.2 |    | Failure of sterile precautions during kidney dialysis or other perfusion                                                                                                                                                               | 50                                                  | U  |
| Y62.3 |    | Failure of sterile precautions during injection or immunization                                                                                                                                                                        | 50                                                  | U  |
| Y63   | 9  | Failure in dosage during surgical and medical care                                                                                                                                                                                     | 50                                                  | C  |
| Y64   | 4  | Contaminated medical or biological substances                                                                                                                                                                                          | 50                                                  | U  |
| Y65.0 |    | Mismatched blood used in transfusion                                                                                                                                                                                                   | 50                                                  | U  |
| Y65.1 |    | Wrong fluid in infusion                                                                                                                                                                                                                | 50                                                  | C  |
| Y66   | 1  | Non administration of surgical and medical care                                                                                                                                                                                        | 38, 53                                              | D  |
| Y69   | 1  | Unspecified misadventure during surgical and medical care                                                                                                                                                                              | 21, 22, 38                                          | C  |
| Y88.0 |    | Sequelae of adverse effects caused by drugs, medicaments and biological substances in therapeutic use                                                                                                                                  | 29, 38                                              | A1 |
| Z03.6 |    | Observation for suspected toxic effect from ingested substance                                                                                                                                                                         | 21, 22, 29, 38                                      | A2 |
| Z88   | 10 | Personal history of allergy to drugs, medicaments and biological substances                                                                                                                                                            | 24                                                  | U  |

\*not a code to search ADE/ADR, rather ADE/ADR identified though searching with other codes
